# Supplementary material
Source: Research Square preprint supplement (doi:10.21203/rs.3.rs-9772028/v1)
Supplement: Supplementary file 1 [file 9bbfb484dda29bf2aafc23b0.docx]

**SUPPLEMENTARY MATERIAL**

**Supplementary Table S1.** Description of *Rhizoctonia* -like isolates used for phylogenetic analysis based on the ITS rDNA region, including collection details and GenBank accession numbers.

| **GenBank** | **Taxonomic assignation** | **Location** | **Host** | **Isolation source** |
| --- | --- | --- | --- | --- |
| AB122145 | *Ceratobasidium* sp. AG-k | Japan | *Allium cepa* | mycelium |
| AB196647 | *Ceratobasidium* sp. | Japan | *Arachis hypogaea* | mycelium |
| AB196650 | *Ceratobasidium* sp. AG-I | Japan | *Artemisia* sp. | mycelia |
| AJ427407 | *Ceratobasidium* sp. AGR | USA | *Cucumis* sp. | mycelia |
| AF354095 | *Ceratobasidium* sp. AGQ | Japan | Cynodon_Soil | mycelia |
| KY075643 | *Ceratobasidium theobromae* | China | *Lonicera japonica* | -- |
| KP119764 | *Ceratobasidium theobromae* | China | *Lonicera japonica* | -- |
| KP119766 | *Ceratobasidium theobromae* | China | *Lonicera japonica* | -- |
| KP119765 | *Ceratobasidium theobromae* | China | *Lonicera japonica* | -- |
| OR145521 | *Ceratobasidium theobromae* | Cambodia | *Manihot esculenta* | petiole |
| OR145522 | *Ceratobasidium theobromae* | Vietnam | *Manihot esculenta* | petiole |
| OR145523 | *Ceratobasidium theobromae* | Lao PDR | *Manihot esculenta* | petiole |
| AB286940 | *Ceratobasidium* sp. AG-P | Japan | -- | -- |
| AB290017 | *Ceratobasidium* sp. AG-E | Japan | -- | -- |
| AB000019 | *Rhizoctonia solani* | Japan | -- | -- |
| AY154313 | *Thanatephorus cucumeris* | Brazil | -- | -- |
| AF354108 | *Thanatephorus cucumeris* | Veracruz | *Solanum tuberosum* | mycelia |
| AF153804 | *Rhizoctonia solani* | Australia | *Pterostylis acuminata* | -- |
| AB286930 | *Ceratobasidium* sp. AG-Ba | Japan | Rice | -- |
| AB196659 | *Ceratobasidium* sp. AG-T | Japan | *Rosa odorata* | -- |
| AB196653 | *Ceratobasidium* sp. AG-L | Japan | Soil | mycelium |
| AB000003 | *Rhizoctonia solani* | Japan | Soil | -- |
| AF153800 | *Rhizoctonia solani* | Australia | Soil | -- |
| AB196649 | *Ceratobasidium* sp. AG-H | Japan | Soil | mycelia |
| AB290021 | *Ceratobasidium* sp. AG-C | Japan | Sugar beet | mycelia |
| KU255726 | *Ceratobasidium theobromae* | Indonesia | *Theobroma cacao* | leaf |
| KU319572 | *Ceratobasidium theobromae* | Indonesia | *Theobroma cacao* | leaf |
| KU255724 | *Ceratobasidium theobromae* | Indonesia | *Theobroma cacao* | petiole |
| KM523668 | *Ceratobasidium theobromae* | Indonesia | *Theobroma cacao* | mycelium |
| KU319573 | *Ceratobasidium theobromae* | Indonesia | *Theobroma cacao* | leaf |
| KU310940 | *Ceratobasidium theobromae* | India | *Theobroma cacao* | petiole |
| KU310941 | *Ceratobasidium theobromae* | India | *Theobroma cacao* | petiole |
| AB000004 | *Rhizoctonia solani* | U.S.A. | Tobacco | -- |
| AB198702 | *Ceratobasidium* sp. AG-D | Japan | *Zoysia japonica* | mycelia |
| MZ159527 | *Scotomyces subviolaceus* | Scotland | -- | -- |
| MT340869 | *Heteroacanthella acanthophysa* | -- | -- | -- |
| PQ192611 | *Ceratobasidium theobromae* | Brazil | *Manihot esculenta* | petiole |
| PQ192612 | *Ceratobasidium theobromae* | Brazil | *Manihot esculenta* | stem |

Adapted from Oliveira et al. (2025).


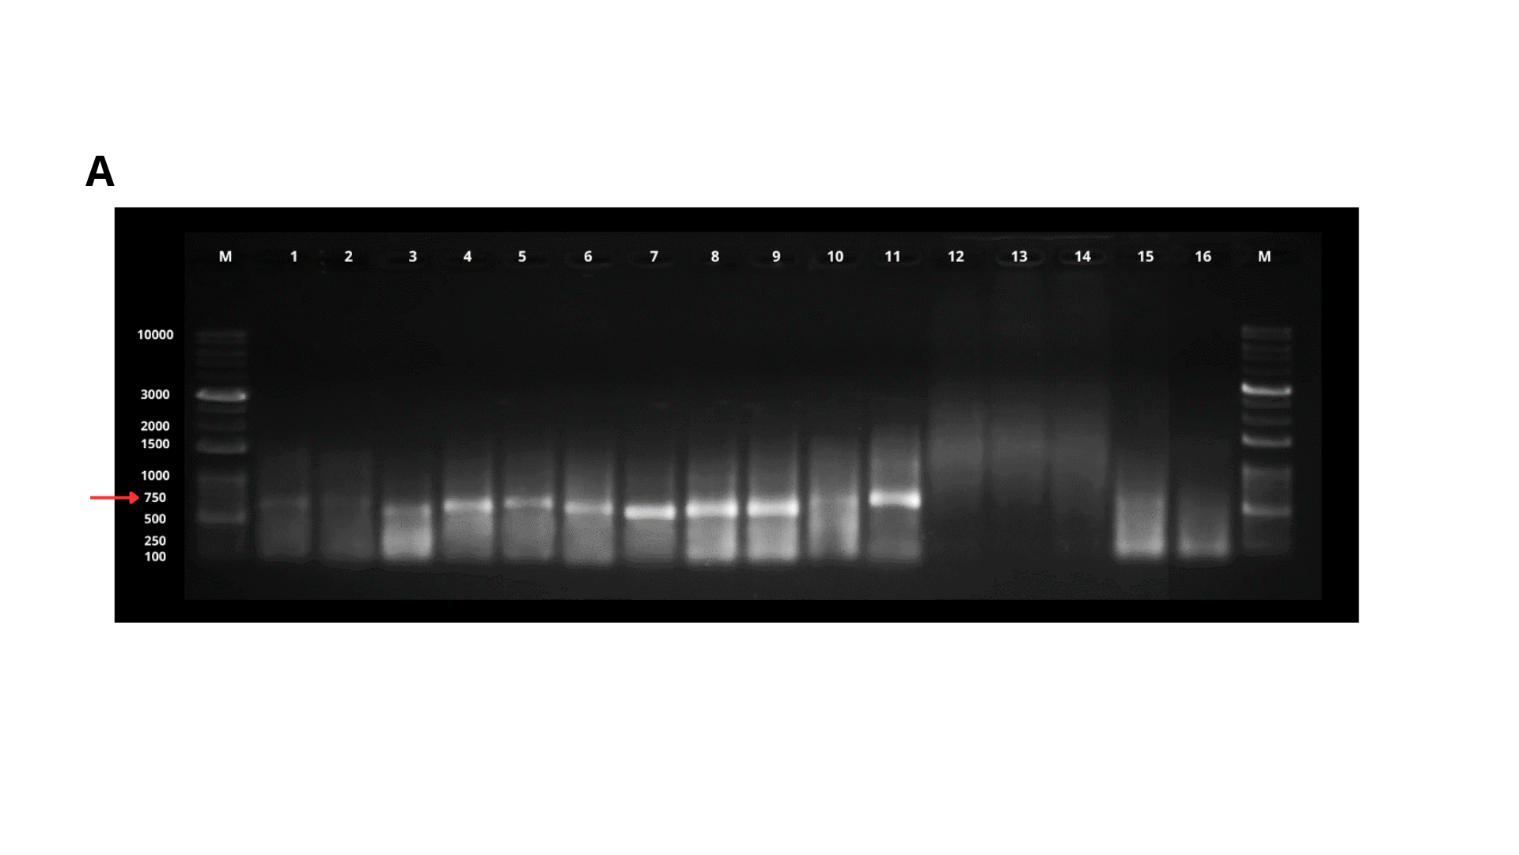


**Figure S1.** PCR products amplified using the CWBD-CIAT-F2/R2 primer set from 16 cassava samples analyzed on agarose 1% gel electrophoresis stained with GelRed and visualized under ultraviolet light. **M:** molecular weight marker (1 kb DNA Plus Ladder, Invitrogen); **lanes 1–11:** leaf and stem samples positive for *R. theobromae*; **lanes 12–15:** leaf and stem samples positive for *R. theobromae* only by qPCR; **lane 16:** negative control (healthy cassava leaf sample).


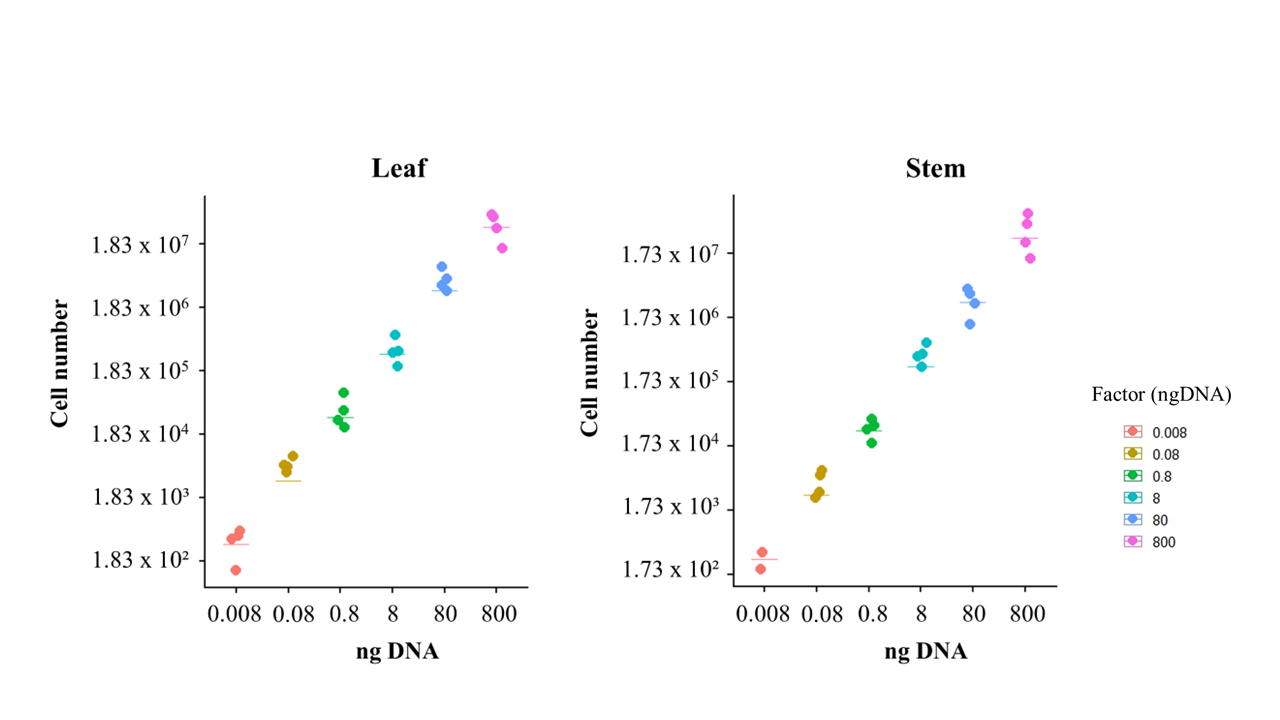


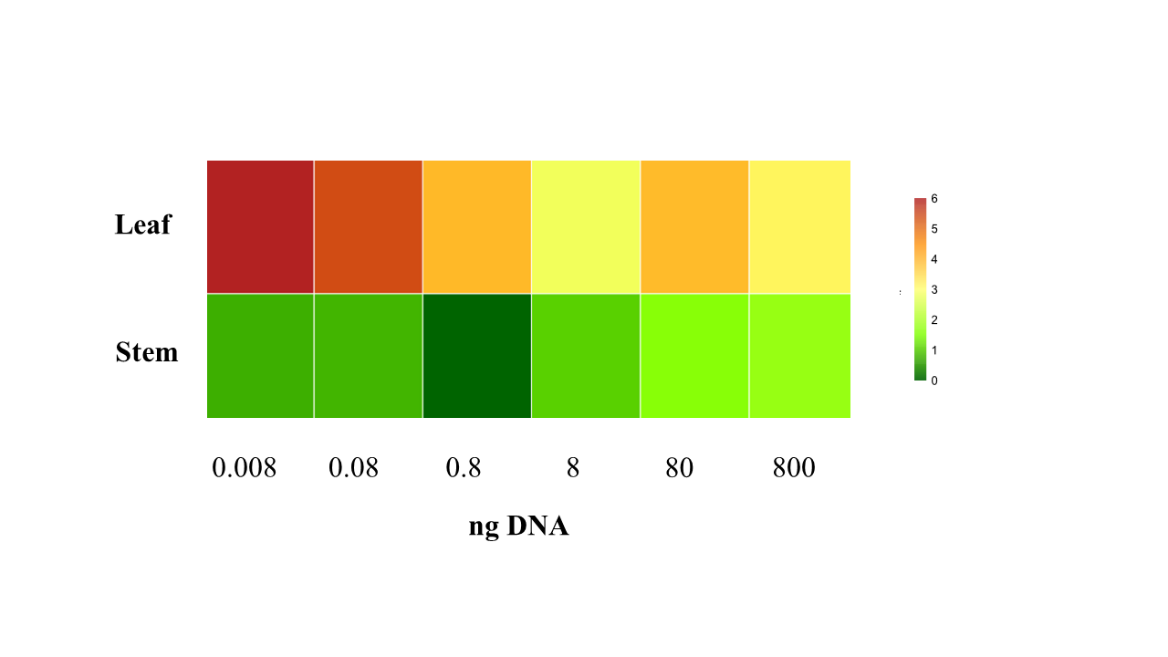


**E**

**Supplemental Figure S2.** Evaluation of the efficiency and specificity of the qPCR system using the *β-tubulin* endogenous control. **(A)** Regression curve for leaf samples; **(B)** Regression curve for stem samples; **(C)** and **(D)** Boxplots representing the number of copies detected in leaves and stems, respectively; **(E)** Heat map representing the average number of copies obtained from ΔCt values.


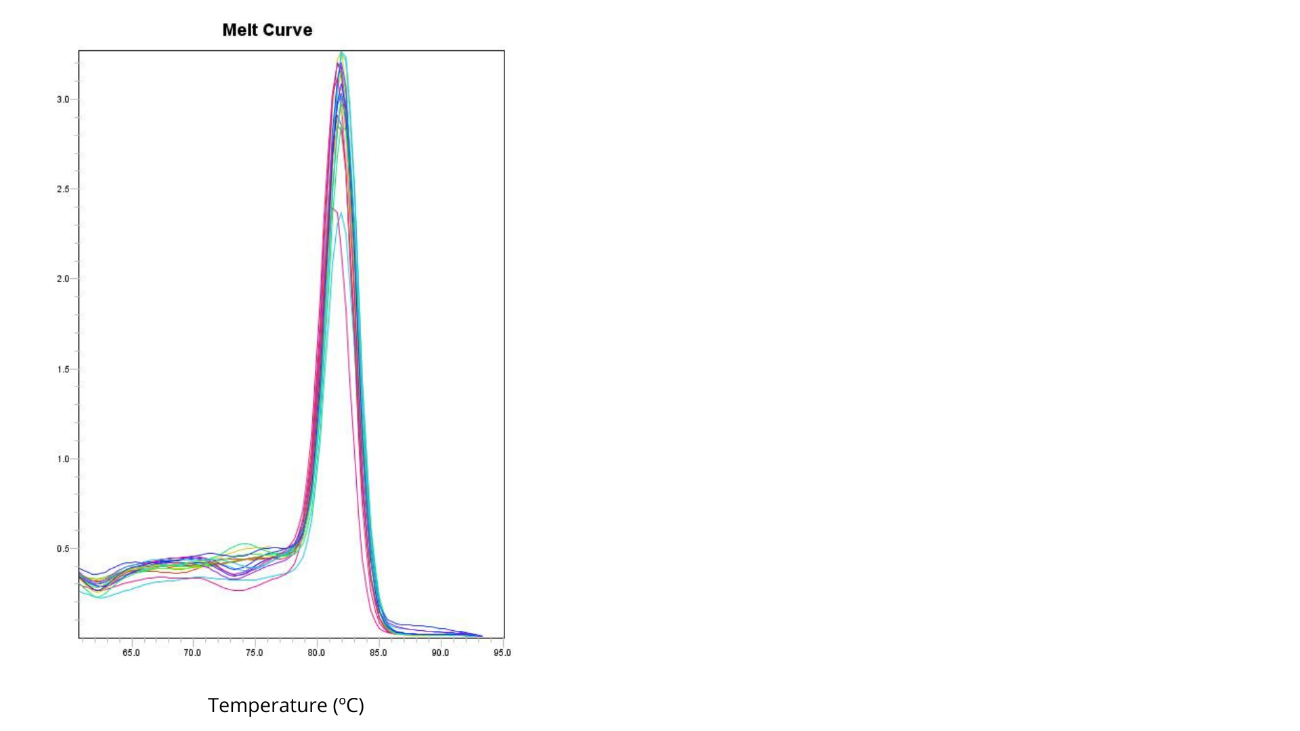


**Figure S3.** Dissociation curve (melt curve) analysis of the qPCR system. The presence of a single, sharp peak indicates high specificity of the amplification and the absence of non-specific products or primer-dimers, confirming the reliability of the *CaMK/CaMKL* probe-based assay.


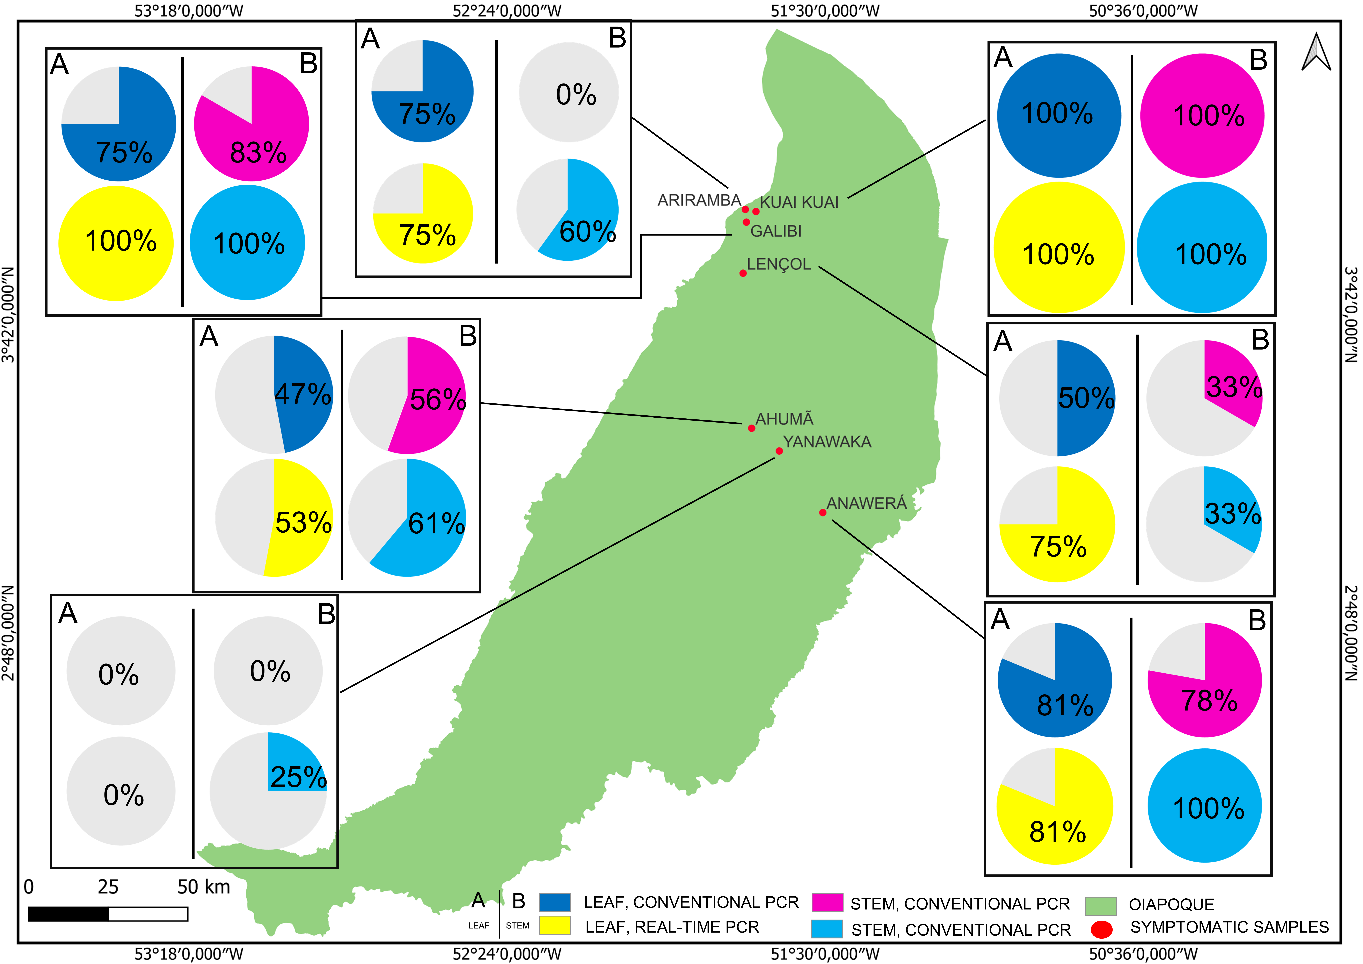


**Figure S4.** Map of *Rhizoctonia theobromae* incidence in cassava sample’s locations collected at villages in the Oiapoque region (Kuai-Kuai, Ariramba, Galibí, Lençol, Ahumã, Anawerá, and Yanawaka). The red dots indicate the collection sites. The pie charts represent the results of molecular detection by both methods: dark blue (leaf, conventional PCR); pink (stem, conventional PCR); yellow (leaf, qPCR); and light blue (stem, qPCR). Column **A** corresponds to the leaf samples, and column **B** corresponds to the stem samples. The green area represents the Oiapoque municipality.
